# Supplementary material
Source: HighWire-hosted journal article supplement (doi:10.1101/rna.080931.125)
Supplement: Supplemental_FigS1.pdf [file Supplemental_FigS1.pdf]

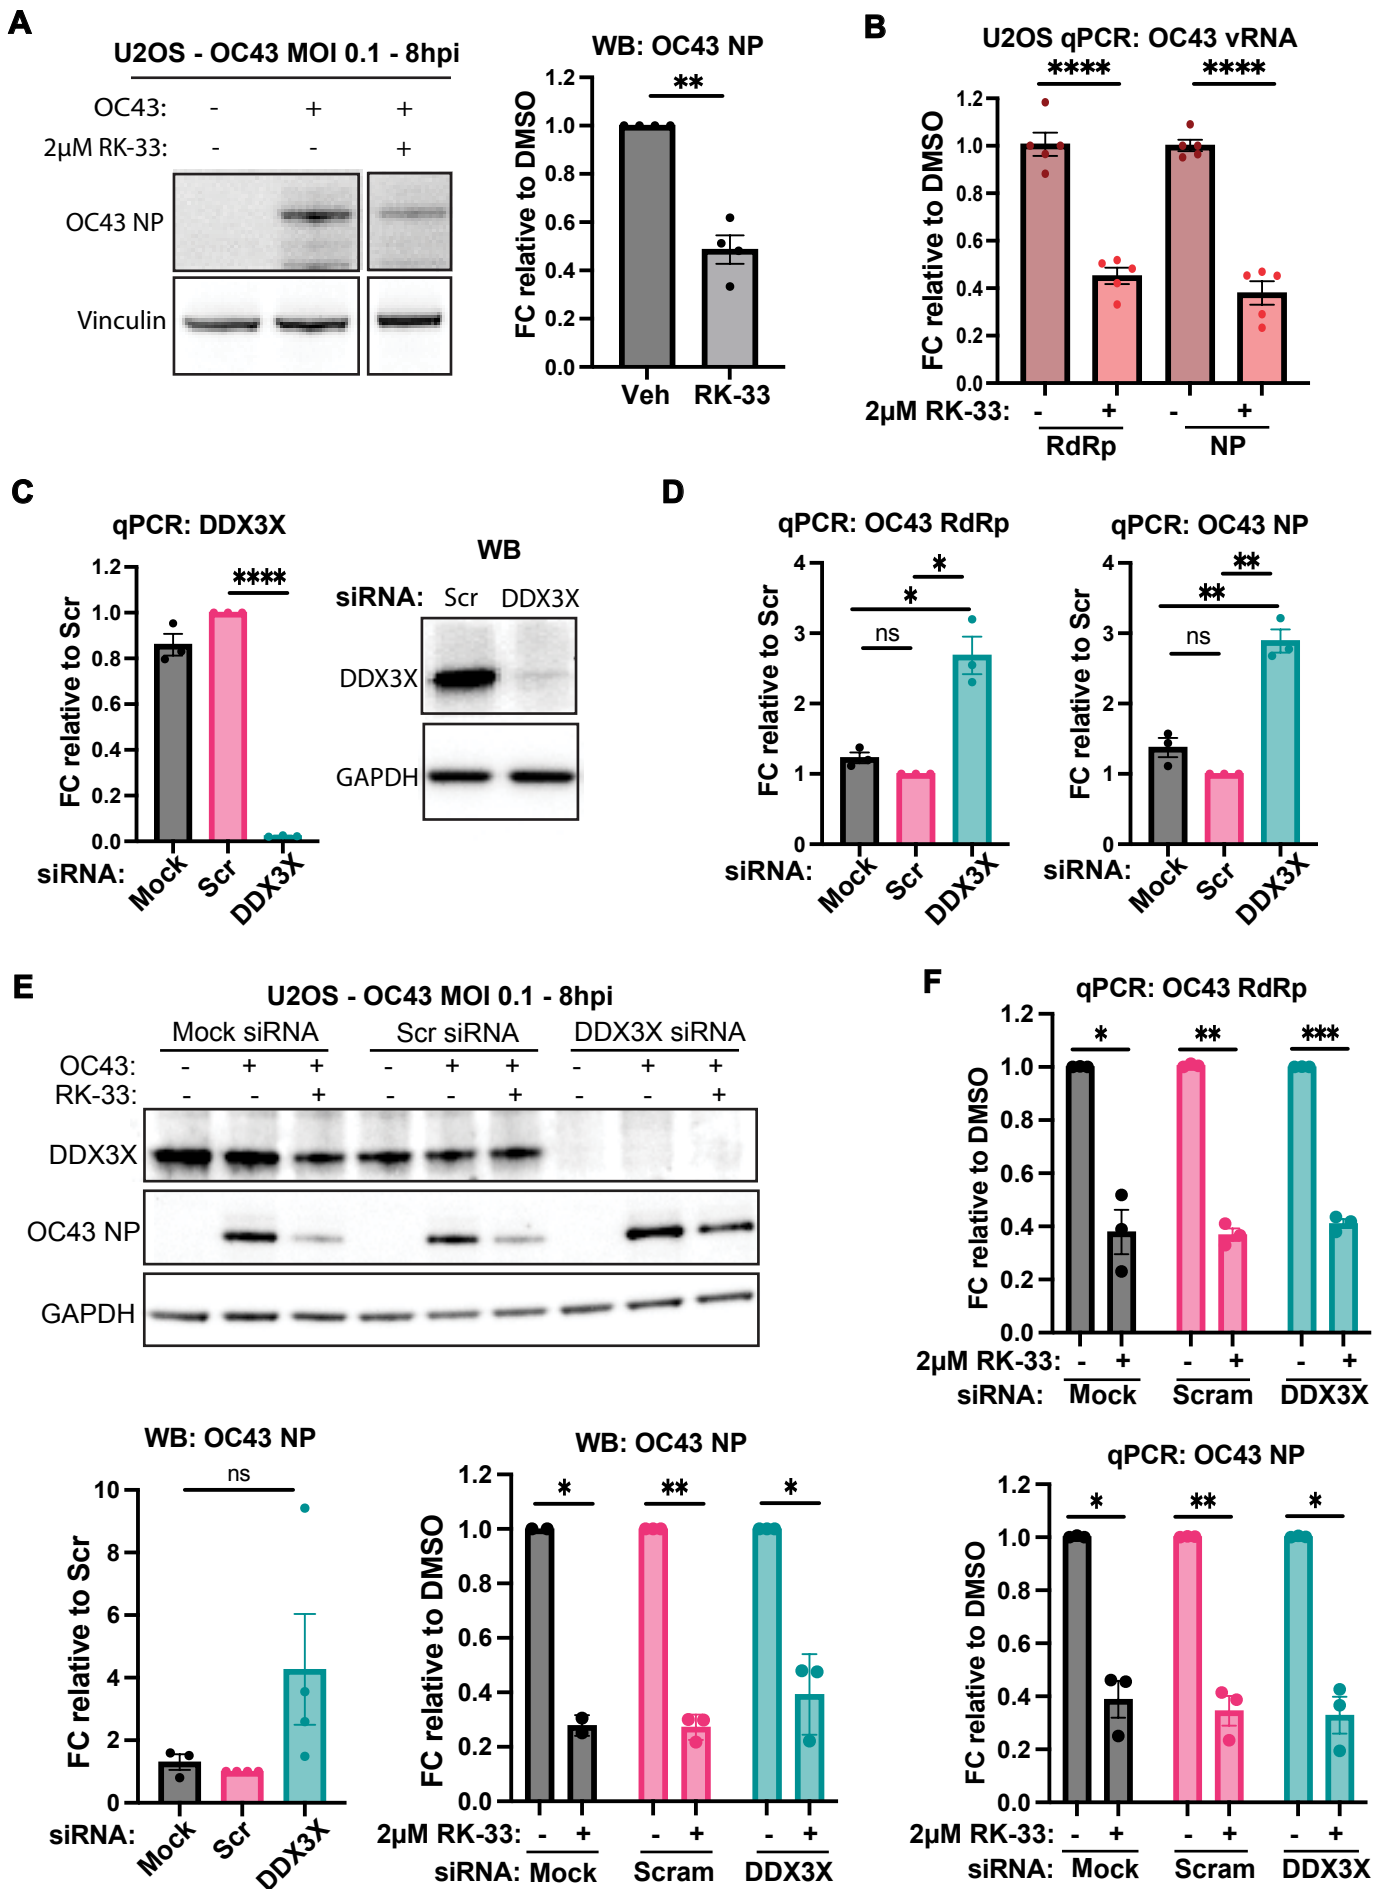

**Supplemental Figure 1: DDX3X knockdown in U2OS supports OC43 infection while remaining sensitive to RK-33 inhibition.** (A, B) WT U2OS cells were infected at an MOI of 0.1 and 2 $\mu$ M RK-33 was added to cells after one hour viral absorption. Cells were harvested and analyzed by WB or qPCR at 8hpi. Representative blot from four independent experiments is shown (A). Five biological replicates over two independent experiments are quantified in (B). (C, D, E, F). WT U2OS cells were transfected with 20nM siRNAs for ~48 hours, followed by infection and RK-33 treatment after viral absorption. qPCR quantification is performed from at least three independent experiments (C, D, F). Representative blot shown from three independent experiments (E). Statistical significance: ns = not significant, \* $P \leq 0.05$ , \*\* $P \leq 0.01$ , \*\*\* $P \leq 0.001$ , \*\*\*\* $P \leq 0.001$ . Tests used: one-sample t-test (panels A, E right, F), two sample t-test (B), one sample and two sample t-test (C, D, E left). Error bars represent mean  $\pm$  SEM.
