# Supplementary material
Source: HighWire-hosted journal article supplement (doi:10.1101/rna.080931.125)
Supplement: Supplemental_FigS4.pdf [file Supplemental_FigS4.pdf]

**A**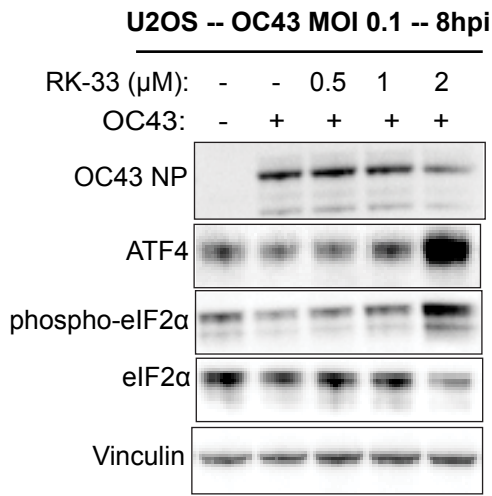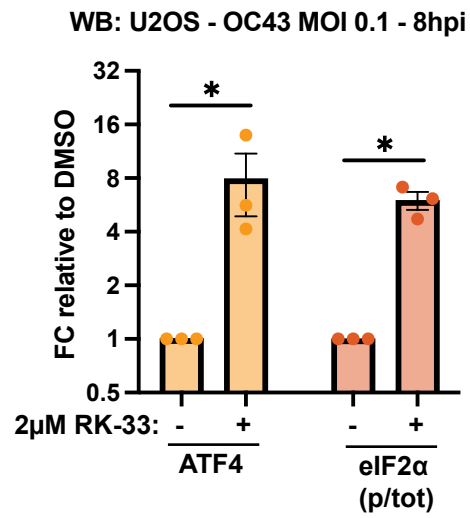**B**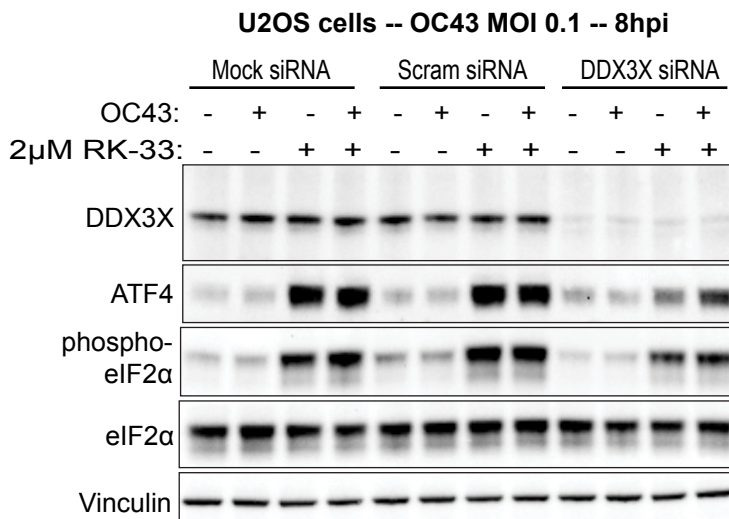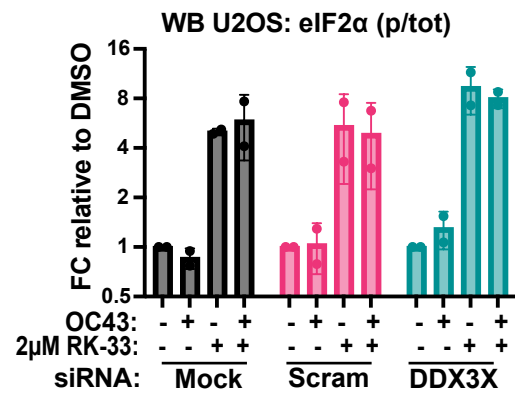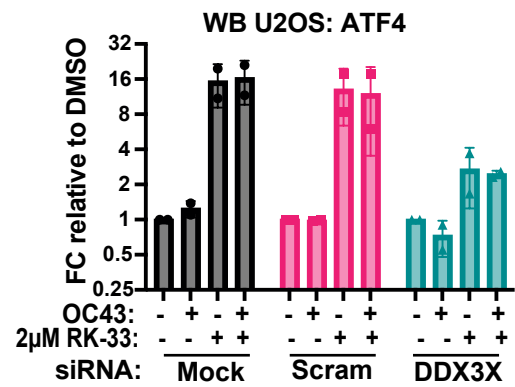

**Supplemental Figure 4: RK-33 stimulates the ISR in U2OS cells.** (A) WT U2OS cells were infected with OC43 and dose-treated with RK-33 after viral absorption. Cells were harvested and analyzed by WB after eight hours of total infection. Representative blots are shown. Quantifications made from three independent experiments. (B) WT U2OS cells were transfected with siRNAs and infected with OC43 as previously described. Cells were harvested and analyzed by WB after eight hours of total infection. Representative blots are shown. Quantifications made from two independent experiments. Tests used: one-sample t-test (panel A). Statistical significance: ns = not significant, \*P ≤ 0.05, \*\*P ≤ 0.01, \*\*\*P ≤ 0.001. Error bars represent mean ± SEM.
