# Supplementary material
Source: HighWire-hosted journal article supplement (doi:10.1101/rna.080931.125)
Supplement: Supplemental_Legends.docx [file Supplemental_Legends.docx]

**Supplemental Figure 1: DDX3X knockdown in U2OS supports OC43 infection while remaining sensitive to RK-33 inhibition.** (**A, B**) WT U2OS cells were infected at an MOI of 0.1 and 2μM RK-33 was added to cells after one hour viral absorption. Cells were harvested and analyzed by WB or qPCR at 8hpi. Representative blot from four independent experiments is shown (A). Five biological replicates over two independent experiments are quantified in (B). (**C, D, E, F**). WT U2OS cells were transfected with 20nM siRNAs for ~48 hours, followed by infection and RK-33 treatment after viral absorption. qPCR quantification is performed from at least three independent experiments (C, D. F). Representative blot shown from three independent experiments (E). Statistical significance: ns = not significant, *P ≤ 0.05, **P ≤ 0.01, ***P ≤ 0.001, ****P ≤ 0.001. Tests used: one-sample t-test (panels A, E right, F), two sample t-test (B), one sample and two sample t-test (C, D, E left). Error bars represent mean ± SEM.

**Supplemental Figure 2: DDX3X KDs have little impact on OC43 growth in MRC-5 cells.** (Linked with Figure 2) (**A**). Average DDX3X intensity/cell was quantified in Scram KD or DDX3X KD cells and representative results from four independent experiments are shown. N > 140 cells/experimental condition in each replicate were quantified. (**B**) The fraction of cells infected by OC43 in MRC-5 cells at 8hpi, MOI 0.1 were quantified and normalized to the Scram knockdown control. (**C**) OC43+ cells were identified in DDX3X knockdown MRC-5 cells and average DDX3X intensity/cell was quantified. Representative results from four independent experiments are shown. N > 45 cells/condition in each replicate were quantified. (**D**) Fraction of cells infected by OC43 were normalized to DMSO treatment. Statistical significance: ns = not significant, *P ≤ 0.05, **P ≤ 0.01, ***P ≤ 0.001, ****P ≤ 0.0001. Tests used: one-way Anova with Kruskal-Wallis test (Panel A, C), one and two sample t-test (B, D). Error bars represent mean ± means (B, D) and quartiles (Panel A, C).

**Supplemental Figure 3: DDX3Y knockdown has no effect on OC43 growth**

**or RK- 33-induced viral growth suppression**. (**A**) DDX3X and DDX3Y mRNA levels

in MRC-5 cells were determined by qPCR and normalized to DDX3X levels.

Quantification was made from non-targeting siRNA controls in three independent

experiments. (**B, C, D**) Knockdown, OC43 infection, and drug treatment in MRC-5 cells

were performed as in Figure 1. qPCR quantification is performed from at least three

independent experiments. Note: Mock and scramble siRNA treatment data is identical

to those in Figure 1, as these experiments were performed alongside DDX3X siRNA

treatment. qPCR analysis of DDX3X single-knockdown is displayed in Figure 1. (**B**)

DDX3X (left) and DDX3Y (right) RNA levels were determined and normalized to Scram

KD. (**C**) Viral OC43 RNA levels were determined and normalized to Scram KD. (**D**) Viral

OC43 RNA levels were determined and normalized to DMSO treatment within

knockdown populations. (**E**) MRC-5 cells were fixed and stained for OC43 genomic

RNA by smFISH. (**F**) Infected cells were segmented and mean viral gRNA intensity per

cell displayed. N > 250 cells per sample. Note: mean viral RNA levels for scramble

siRNA treatment is identical to that in Figure 2B, as this experiment was performed

alongside that DDX3X siRNA replicate. Statistical significance: ns = not significant, *P ≤

0.05, **P ≤ 0.01, ***P ≤ 0.001, ****P ≤ 0.0001. Tests used: one and two-sample t-tests

(Panel B, C), one-sample t-test (D). Error bars represent mean ± SEM (A, B, C, D) or means and quartiles (Panel F).

**Supplemental Figure 4: RK-33 stimulates the ISR in U2OS cells.** (**A**) WT U2OS cells were infected with OC43 and dose-treated with RK-33 after viral absorption. Cells were harvested and analyzed by WB after eight hours of total infection. Representative blots are shown. Quantifications made from three independent experiments. (**B**) WT U2OS cells were transfected with siRNAs and infected with OC43 as previously described. Cells were harvested and analyzed by WB after eight hours of total infection. Representative blots are shown. Quantifications made from two independent experiments. Tests used: one-sample t-test (panel A). Statistical significance: ns = not significant, *P ≤ 0.05, **P ≤ 0.01, ***P ≤ 0.001. Error bars represent mean ± SEM.
