# Supplementary material
Source: HighWire-hosted journal article supplement (doi:10.1101/rna.080931.125)
Supplement: Supplemental_Table1.xlsx [file Supplemental_Table1.xlsx]

## Sheet: Antibody Information
	Primary Antibodies
	Target	Species	Manufacturer/Cat. #	Dilution WB	Dilution IF
	OC43 NP	Mouse	Sigma-Aldrich MAB9013	1:1000	1:1000
	Vinculin	Mouse	Sigma-Aldrich V9131	1:10000
	DDX3	Mouse	SC-365768	1:500	1:200
	ATF4	Rabbit	CST 11815T	1:1000
	eIF2a	Rabbit	CST 9722S	1:1000
	p-eIF2a	Rabbit	Abcam ab32157	1:1000
	PABP	Rabbit	Abcam ab21060		1:1000
	GAPDH	Rabbit	CST 2118	1:2000
	Secondary Antibodies
	Target	Species	Manufacturer/Cat. #	Dilution WB	Dilution IF
	Mouse-HRP	Goat	CST 7076S	1:4000
	Rabbit-HRP	Goat	CST 7074S	1:4000
	Mouse-AF488	Goat	Thermo A32723		1:1000
	Rabbit-AF647	Goat	Abcam ab150079		1:1000
	Mouse-ATTO550	Goat	Millipore 43394		1:1000
	Rabbit-ATTO488	Goat	Millipore 18772		1:1000

## Sheet: FISH probes
	y FLAP	TTACACTCGGACCTCGTCGACATGCATT
	V2 OC43 5' FISH Set
	Probe #	Probe Seq	Probe Seq + Y FLAP
	1	taggagcaagaacttcctcg	taggagcaagaacttcctcgTTACACTCGGACCTCGTCGACATGCATT
	2	ccagcacttgtgacagttaa	ccagcacttgtgacagttaaTTACACTCGGACCTCGTCGACATGCATT
	3	cctgttcactagcaacacaa	cctgttcactagcaacacaaTTACACTCGGACCTCGTCGACATGCATT
	4	ccaaagtgtcctctaagact	ccaaagtgtcctctaagactTTACACTCGGACCTCGTCGACATGCATT
	5	ccgacatttctacatcttct	ccgacatttctacatcttctTTACACTCGGACCTCGTCGACATGCATT
	6	taggcacatacagacccaaa	taggcacatacagacccaaaTTACACTCGGACCTCGTCGACATGCATT
	7	atcgcaaccagcaattgttg	atcgcaaccagcaattgttgTTACACTCGGACCTCGTCGACATGCATT
	8	ttctgcatcactgccaaaac	ttctgcatcactgccaaaacTTACACTCGGACCTCGTCGACATGCATT
	9	gtataacacccaaagatcct	gtataacacccaaagatcctTTACACTCGGACCTCGTCGACATGCATT
	10	acaactgactatactgttgc	acaactgactatactgttgcTTACACTCGGACCTCGTCGACATGCATT
	11	agcaggtatcttattaacca	agcaggtatcttattaaccaTTACACTCGGACCTCGTCGACATGCATT
	12	agcaacataaccaccttgtg	agcaacataaccaccttgtgTTACACTCGGACCTCGTCGACATGCATT
	13	actgccaatcacataaggtt	actgccaatcacataaggttTTACACTCGGACCTCGTCGACATGCATT
	14	atgcatttccagtatgcaac	atgcatttccagtatgcaacTTACACTCGGACCTCGTCGACATGCATT
	15	agcctttaagcttaagagct	agcctttaagcttaagagctTTACACTCGGACCTCGTCGACATGCATT
	16	actcaccacacttgcatata	actcaccacacttgcatataTTACACTCGGACCTCGTCGACATGCATT
	17	aagtgggctgtaaatggcac	aagtgggctgtaaatggcacTTACACTCGGACCTCGTCGACATGCATT
	18	ccacaacacaagctgcttta	ccacaacacaagctgctttaTTACACTCGGACCTCGTCGACATGCATT
	19	ccatcaacaacagccataga	ccatcaacaacagccatagaTTACACTCGGACCTCGTCGACATGCATT
	20	ccatacaattgggcaatttc	ccatacaattgggcaatttcTTACACTCGGACCTCGTCGACATGCATT
	21	gggtttacaacaacttctgc	gggtttacaacaacttctgcTTACACTCGGACCTCGTCGACATGCATT
	22	atgtgccatatggccattag	atgtgccatatggccattagTTACACTCGGACCTCGTCGACATGCATT
	23	gcaatagcttttgcaacacc	gcaatagcttttgcaacaccTTACACTCGGACCTCGTCGACATGCATT
	24	taacaaactgctgtccagct	taacaaactgctgtccagctTTACACTCGGACCTCGTCGACATGCATT
	25	cttaaccatatcggtagtct	cttaaccatatcggtagtctTTACACTCGGACCTCGTCGACATGCATT
	26	atctccagtagcacaaactc	atctccagtagcacaaactcTTACACTCGGACCTCGTCGACATGCATT
	27	agttttacataatttgcccc	agttttacataatttgccccTTACACTCGGACCTCGTCGACATGCATT
	28	gcatcaggtccaacaacatt	gcatcaggtccaacaacattTTACACTCGGACCTCGTCGACATGCATT
	29	taactttgtttaccctgtgt	taactttgtttaccctgtgtTTACACTCGGACCTCGTCGACATGCATT
	30	acaacacagtcatagttgtt	acaacacagtcatagttgttTTACACTCGGACCTCGTCGACATGCATT
	31	aagacacatcagaaggcaca	aagacacatcagaaggcacaTTACACTCGGACCTCGTCGACATGCATT
	32	gtttcttagcagtaccaagt	gtttcttagcagtaccaagtTTACACTCGGACCTCGTCGACATGCATT
	33	cctcttgattattgctaaca	cctcttgattattgctaacaTTACACTCGGACCTCGTCGACATGCATT
	34	cctcaacagcagttatctga	cctcaacagcagttatctgaTTACACTCGGACCTCGTCGACATGCATT
	35	aagaaagacgcgctgccaat	aagaaagacgcgctgccaatTTACACTCGGACCTCGTCGACATGCATT
	36	acaatggaacgtccaacatt	acaatggaacgtccaacattTTACACTCGGACCTCGTCGACATGCATT
	37	cttattagcatctgtttcgt	cttattagcatctgtttcgtTTACACTCGGACCTCGTCGACATGCATT
	38	tcaagtgctatatcatgtct	tcaagtgctatatcatgtctTTACACTCGGACCTCGTCGACATGCATT
	39	ctgaacgaaggttcgtgcat	ctgaacgaaggttcgtgcatTTACACTCGGACCTCGTCGACATGCATT
	40	cctcaggtacaacatcaaca	cctcaggtacaacatcaacaTTACACTCGGACCTCGTCGACATGCATT
	41	aacttattgacaacacgcca	aacttattgacaacacgccaTTACACTCGGACCTCGTCGACATGCATT
	42	cttaacggttctaacaccat	cttaacggttctaacaccatTTACACTCGGACCTCGTCGACATGCATT
	43	tgcctccagtacactcaaaa	tgcctccagtacactcaaaaTTACACTCGGACCTCGTCGACATGCATT
	44	tttatcctggctgcatatat	tttatcctggctgcatatatTTACACTCGGACCTCGTCGACATGCATT
	45	cctgctgtacataaccaaaa	cctgctgtacataaccaaaaTTACACTCGGACCTCGTCGACATGCATT
	46	taatttgagcaacagtagcc	taatttgagcaacagtagccTTACACTCGGACCTCGTCGACATGCATT
	47	caagatgtccactttatcca	caagatgtccactttatccaTTACACTCGGACCTCGTCGACATGCATT
	48	ccaacaggcacaaacctatt	ccaacaggcacaaacctattTTACACTCGGACCTCGTCGACATGCATT

## Sheet: qPCR Primers
		Primer set name	ncbi ID	GenBank Accession	NCBI protein accession	Forward Primer	For Primer Tm	Reverse primer	Rev primer Tm	amplicon size	reference
		GAPDH	2597	NM_001256799	NP_001243728	GGAGCGAGATCCCTCCAAAAT	61.6	GGCTGTTGTCATACTTCTCATGG	60.9	197	This paper, designed by MGH Primer Bank
		OC43 RdRp				GAGTGTAGATGCCCGTCTCG	57	ATCAACACGCTGAAAACGGC	57	142	Fausto et al, 2023
		OC43 NP				TACGGCACCGATATTGACGG	60	GTGCGCGAAGTAGATCTGGA	60	200	Fausto et al, 2023
		DDX3X	1654	NM_001193416	NP_001180345	AGCAGTTTTGGATCTCGTAGTG	60	ACTGTTTCCACCACGTTCAAAT	60.6	168	This paper, designed by MGH Primer Bank
		DDX3Y	8653	NM_004660	NP_004651	CGGCAGTAACTGTCCTCCACAT	60	CTGGAGTAGGACGAGTATAGCG	57	104	This paper, designed by Origene
