# Supplementary material
Source: HighWire-hosted journal article supplement (doi:10.1101/rna.080931.125)

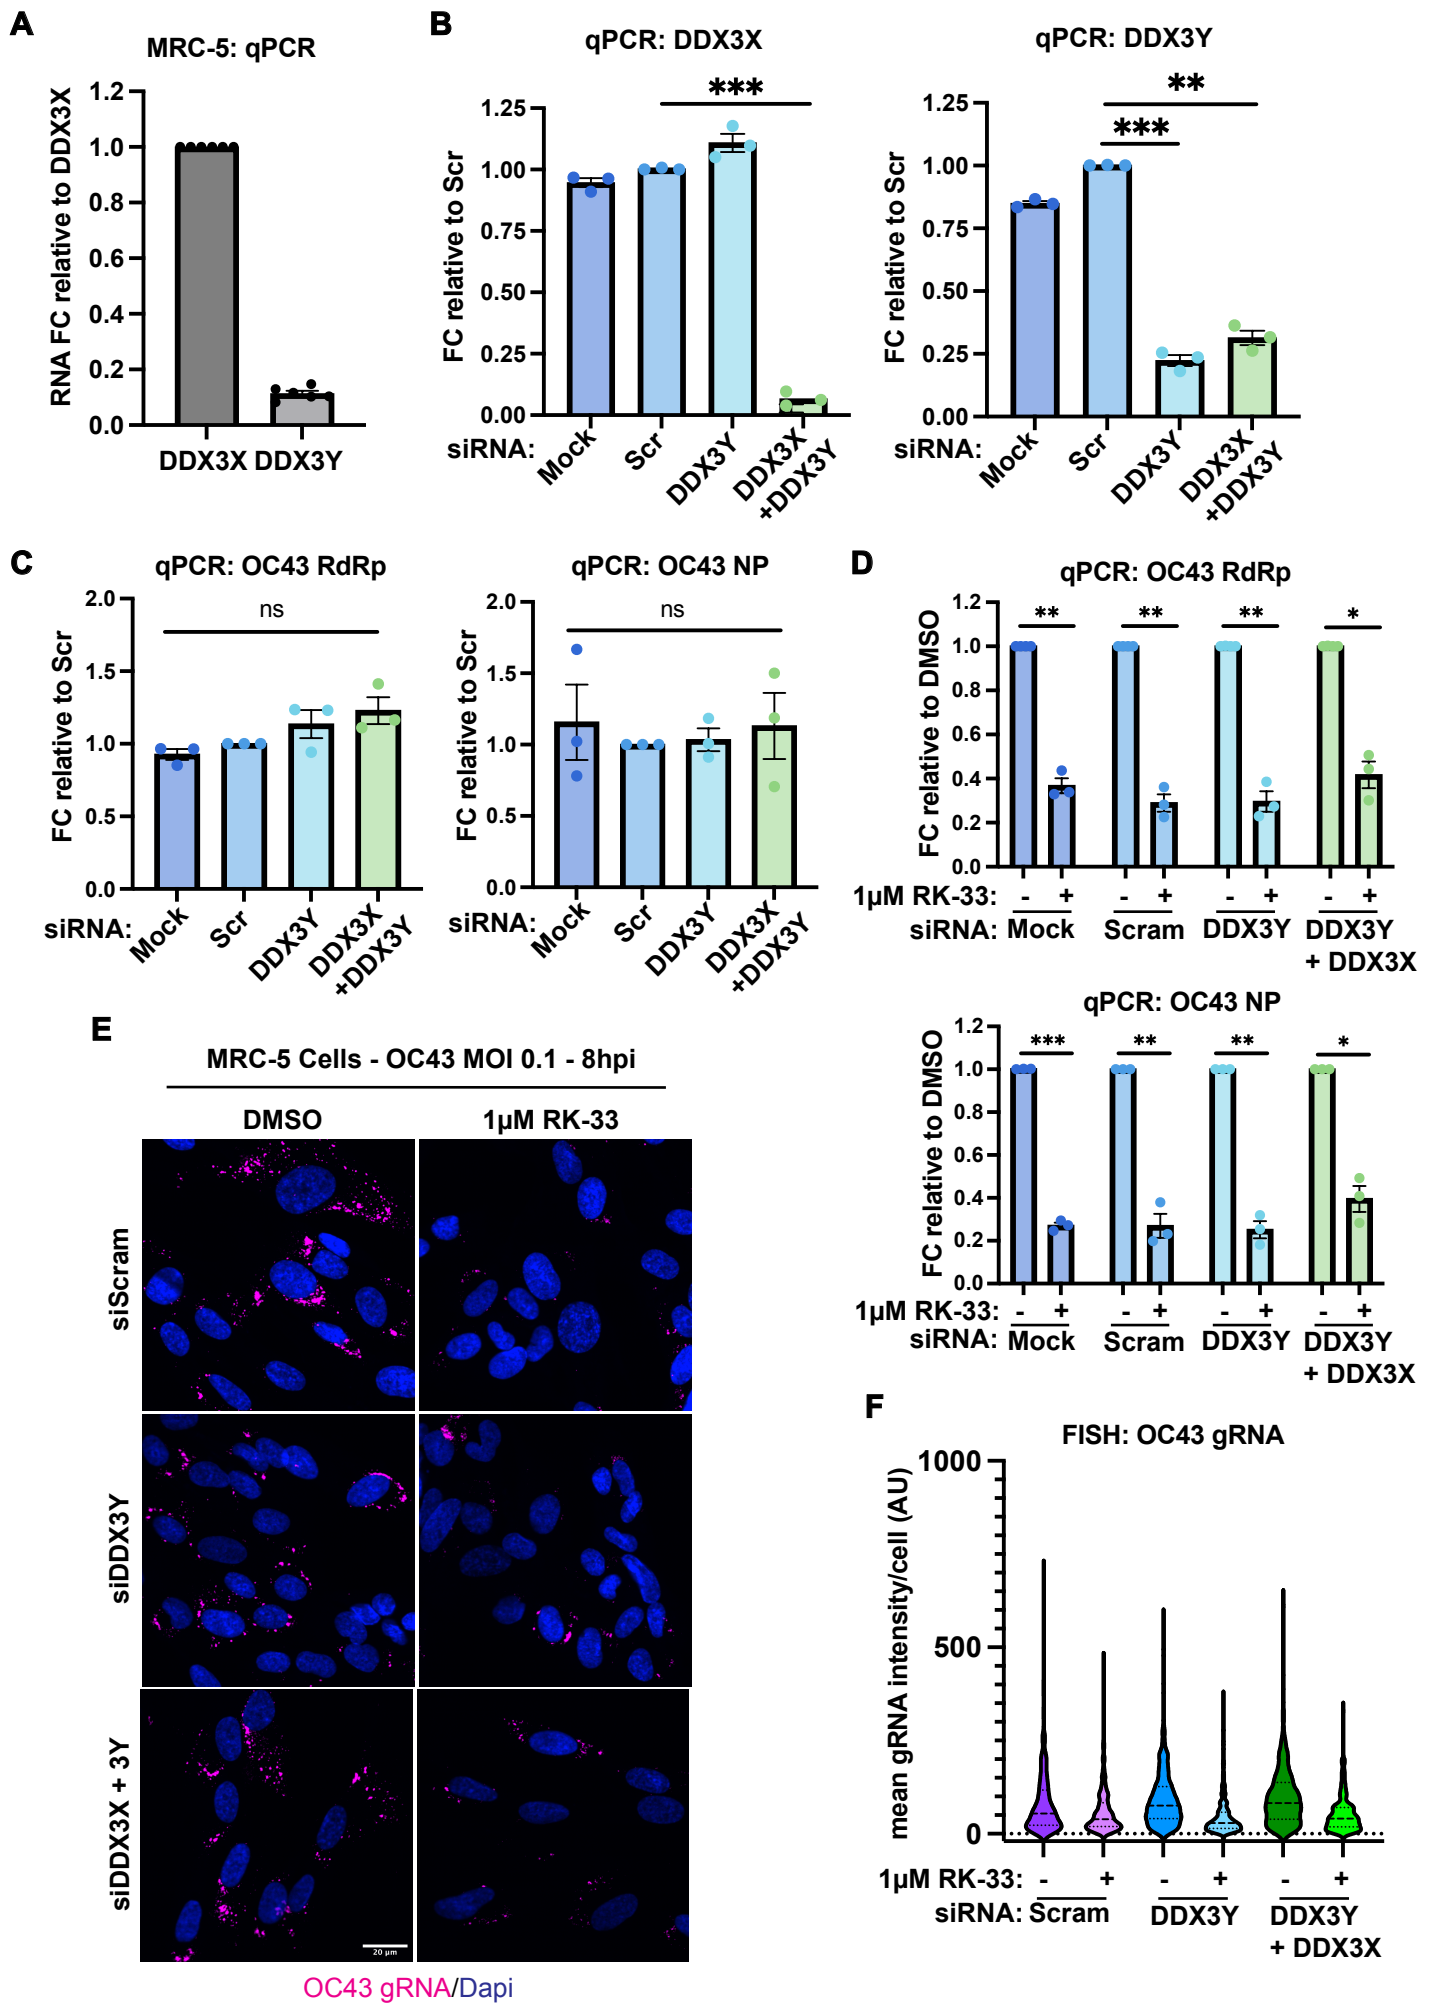

Supplement: Supplemental_FigureS3.pdf [file Supplemental_FigureS3.pdf]
